# Supplementary material for: Screen time and its correlates among children aged 3–10 years during COVID-19 pandemic in Nepal: a community-based cross-sectional study
Source: HighWire-hosted journal article supplement (doi:10.1136/bmjophth-2022-001052), 2022-08-01
Supplement: bmjophth-2022-001052supp001_data_supplement.pdf [file bmjophth-2022-001052supp001_data_supplement.pdf]

**Supplementary Table 1: Change in sleeping, playing (except using screen), and screen time due to COVID-19 pandemic**

| Daily Behavior        |  |                 | Median | Mean Rank | Z      | p-value |
|-----------------------|--|-----------------|--------|-----------|--------|---------|
| Screen time (hours)   |  | Before COVID-19 | 1.00   | 116.60    | -17.77 | <0.001  |
|                       |  | During COVID-19 | 2.25   | 275.77    |        |         |
| Sleeping time (hours) |  | Before COVID-19 | 10.00  | 63.49     | -3.89  | <0.001  |
|                       |  | During COVID-19 | 10.00  | 65.18     |        |         |
| Playing time (hours)  |  | Before COVID-19 | 2.00   | 155.00    | -9.87  | <0.001  |
|                       |  | During COVID-19 | 1.00   | 88.01     |        |         |
