# Supplementary material for: Screen time and its correlates among children aged 3–10 years during COVID-19 pandemic in Nepal: a community-based cross-sectional study
Source: HighWire-hosted journal article supplement (doi:10.1136/bmjophth-2022-001052), 2022-08-01
Supplement: bmjophth-2022-001052supp002_data_supplement.pdf [file bmjophth-2022-001052supp002_data_supplement.pdf]

**Supplementary table 2: Perceived children's vision problem due to COVID-19 pandemic**

| Effects                                  |                   | n   | %    |
|------------------------------------------|-------------------|-----|------|
| Perceived change in children's vision    | same as before    | 91  | 14.4 |
|                                          | Worse than before | 18  | 2.9  |
|                                          | Don't know        | 512 | 82.7 |
| Perceived change in the amount of eating | Not changed       | 558 | 88.6 |
|                                          | Decreased         | 37  | 5.9  |
|                                          | Increased         | 35  | 5.6  |
